# Supplementary material for: Characterization of the Nano-Rod Arrays of Pyrite Thin Films Prepared by Aqueous Chemical Growth and a Subsequent Sulfurization
Source: MDPI journal article supplement (doi:10.3390/ma15196946), 2022-10-06
Supplement: s1 [file s1]

# Characterization of the Nano-Rod Arrays of Pyrite Thin Films Prepared by Aqueous Chemical Growth and Sulfurization

Mohammad Talaeizadeh <sup>1</sup>, Seyyed Ali Seyyed Ebrahimi <sup>1,\*</sup>, Payam Khosravi <sup>1,2</sup> and Bejan Hamawandi <sup>3,\*</sup>

<sup>1</sup> Advanced Magnetic Materials Research Center, School of Metallurgy and Materials, College of Engineering, University of Tehran, Tehran 111554563, Iran

<sup>2</sup> Department of Materials Engineering, Isfahan University of Technology, Isfahan 84156-83111, Iran

<sup>3</sup> Department of Applied Physics, KTH Royal Institute of Technology, SE-106 91 Stockholm, Sweden

\* Correspondence: saseyyed@ut.ac.ir (S.A.S.E.), bejan@kth.se (B.H.)

As mentioned in the experimental and procedure section, the precursors become the final product after 3 steps. The product of these steps encoded respectively by X1, X2, and X3 (where X stands for G, F, or P):

Raw materials  $\rightarrow^1$  X1  $\rightarrow^2$  X2  $\rightarrow^3$  X3

In this section, we will introduce the reactions of each step.

The first step is ACG process which includes hydration and deposition. In this step  $\text{FeCl}_3 \cdot 6\text{H}_2\text{O}$ , as precursor, participates in the following reaction in an aqueous solution:

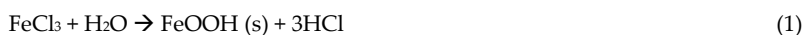

As a result  $\beta$ -FeOOH in form of Nano-rods is deposited. This product is called X1.

The second step is calcination. In this step X1 specimens were tempered and experience the following reaction:

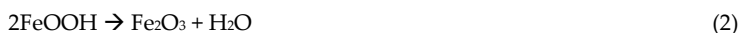

As the result, the Nano-rods' composition converts to  $\alpha$ - $\text{Fe}_2\text{O}_3$  (Hematite). The product is called X2 at this step.

The final step is sulfurization. In this step X2 specimens were annealed in Sulfur containing atmosphere and the following reaction occurs:

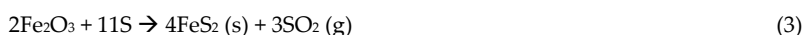

As the result, Nano-rods' chemical composition change into  $\text{FeS}_2$ . These specimens are called X3.  $\text{FeS}_2$  crystal phase in X3 specimens is composed of a mix of pyrite and Marcasite.
